# Supplementary material
Source: PubMed Central journal article supplement (PMC7845426)
Supplement: ear-0026-0335-s01.pdf [file ear-0026-0335-s01.pdf]

「 Survey of Mental Disorders in Korea 」  
cohort  
 $n = 5,102$

Excluded:  $n = 4,531$   
Did not answer the Internet Overuse  
Screening Questionnaire (IOS-Q)

Random selection

**Sample of the current study**

Answered the IOS-Q  
 $n = 571$

Random selection

Development of the short  
form of the IOS-Q (IOS-Qs)  
 $n = 188$

Validation of the IOS-Qs  
 $n = 383$

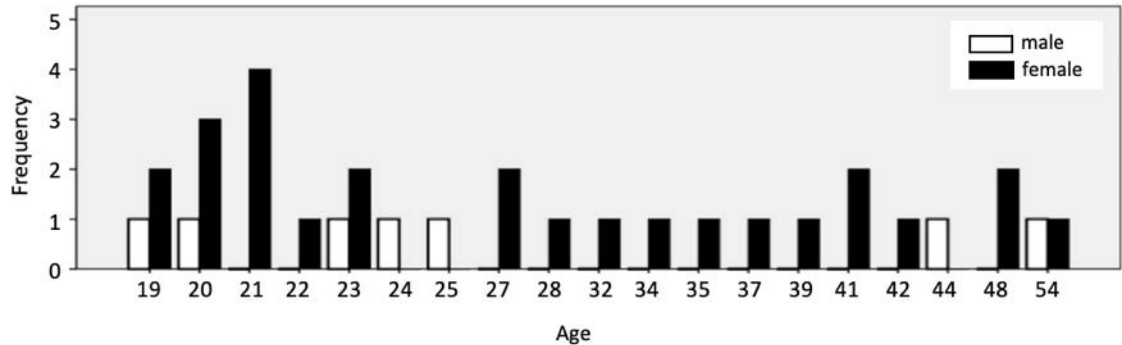

*Supplementary Figure 1.*

Flow chart of the studied sample

*Supplementary Figure 2.*

Frequencies of problematic internet over-users across gender and age

1 *Supplementary table 1*

## 2 Subject demographics

| Variables                      | Development<br>sample<br>( <i>n</i> = 188) | Validation<br>sample<br>( <i>n</i> = 383) | Total<br>( <i>N</i> = 571) |
|--------------------------------|--------------------------------------------|-------------------------------------------|----------------------------|
| <b>Age (years)</b>             |                                            |                                           |                            |
| 18–29                          | 73 (38.8)                                  | 147 (38.4)                                | 220 (38.5)                 |
| 30–39                          | 39 (20.7)                                  | 84 (21.9)                                 | 123 (21.5)                 |
| 40–49                          | 37 (19.7)                                  | 81 (21.1)                                 | 118 (20.7)                 |
| 50–59                          | 28 (14.9)                                  | 48 (12.5)                                 | 76 (13.3)                  |
| 60–69                          | 10 (5.3)                                   | 15 (3.9)                                  | 25 (4.4)                   |
| 70–79                          | 1 (0.5)                                    | 6 (1.6)                                   | 7 (1.2)                    |
| ≥80                            | 0 (0.0)                                    | 2 (0.5)                                   | 2 (0.4)                    |
| Mean (standard deviation)      | 46.78 (13.27)                              | 36.74 (13.55)                             | 36.75 (13.44)              |
| Range                          | 18-73                                      | 18-81                                     | 18-81                      |
| <b>Gender</b>                  |                                            |                                           |                            |
| Male                           | 94 (50.0)                                  | 198 (51.7)                                | 292 (51.1)                 |
| Female                         | 94 (50.0)                                  | 185 (48.3)                                | 279 (48.9)                 |
| <b>Education</b>               |                                            |                                           |                            |
| ≤ Elementary school (≤ 6years) | 1 (0.5)                                    | 8 (2.1)                                   | 9 (1.6)                    |
| Middle school (7-9 years)      | 3 (1.6)                                    | 8 (2.1)                                   | 11 (1.9)                   |
| High school (10-12 years)      | 34 (18.1)                                  | 70 (18.3)                                 | 104 (18.2)                 |
| > University (> 12 years)      | 150 (79.8)                                 | 297 (77.5)                                | 447 (78.3)                 |
| Mean (standard deviation)      | 15.18 (2.61)                               | 14.64 (2.84)                              | 14.75 (2.78)               |
| Range                          | 6-24                                       | 0-26                                      | 0-26                       |
| <b>Marital status</b>          |                                            |                                           |                            |
| Married                        | 92 (48.9)                                  | 180 (47.0)                                | 272 (47.6)                 |
| Divorced/ Widowed              | 7 (3.8)                                    | 24 (6.3)                                  | 31 (5.5)                   |
| Unmarried                      | 89 (47.3)                                  | 179 (46.7)                                | 268 (46.9)                 |

3

4

5

6

7

1 *Supplementary table 2*

2 Response frequencies comparing the original Internet Overuse Screening

3 Questionnaire (IOS-Q) in the development sample ( $n = 188$ ) to the short-form of the4 IOS (IOS-Qs) and validation sample ( $n = 383$ ).

| Item number <sup>a</sup> | Development of the IOS-Q<br>(28 items, $n = 188$ ) |    |    |   | Validation of the IOS-Qs<br>(8 items, $n = 383$ ) |     |    |   |
|--------------------------|----------------------------------------------------|----|----|---|---------------------------------------------------|-----|----|---|
|                          | Response categories <sup>b</sup>                   |    |    |   | Response categories                               |     |    |   |
|                          | 1                                                  | 2  | 3  | 4 | 1                                                 | 2   | 3  | 4 |
| 7                        | 173                                                | 12 | 2  | 1 | 340                                               | 33  | 7  | 3 |
| 6                        | 178                                                | 8  | 2  | 0 | 341                                               | 35  | 7  | 0 |
| 22                       | 178                                                | 9  | 1  | 0 | 350                                               | 29  | 3  | 1 |
| 21                       | 180                                                | 7  | 1  | 0 | 352                                               | 26  | 4  | 1 |
| 18                       | 181                                                | 7  | 0  | 0 | 369                                               | 13  | 1  | 0 |
| 23                       | 183                                                | 5  | 0  | 0 | 358                                               | 22  | 3  | 0 |
| 14                       | 184                                                | 4  | 0  | 0 | 374                                               | 9   | 0  | 0 |
| 24                       | 185                                                | 3  | 0  | 0 | 366                                               | 14  | 3  | 0 |
| Items not used in IOS-Qs |                                                    |    |    |   |                                                   |     |    |   |
| 1                        | 145                                                | 39 | 3  | 1 | 289                                               | 86  | 8  | 0 |
| 2                        | 162                                                | 23 | 2  | 1 | 322                                               | 59  | 2  | 0 |
| 3                        | 167                                                | 18 | 3  | 0 | 322                                               | 50  | 10 | 1 |
| 4                        | 168                                                | 18 | 1  | 1 | 330                                               | 43  | 9  | 1 |
| 5                        | 132                                                | 45 | 8  | 3 | 255                                               | 86  | 33 | 9 |
| 8                        | 169                                                | 15 | 4  | 0 | 333                                               | 41  | 5  | 4 |
| 9                        | 150                                                | 28 | 8  | 2 | 285                                               | 74  | 21 | 3 |
| 10                       | 158                                                | 20 | 9  | 1 | 297                                               | 64  | 17 | 5 |
| 11                       | 172                                                | 13 | 3  | 0 | 343                                               | 34  | 6  | 0 |
| 12                       | 119                                                | 51 | 14 | 4 | 243                                               | 105 | 31 | 4 |
| 13                       | 161                                                | 20 | 6  | 1 | 336                                               | 37  | 9  | 1 |
| 15                       | 183                                                | 3  | 2  | 0 | 358                                               | 17  | 5  | 3 |
| 16                       | 155                                                | 26 | 5  | 2 | 298                                               | 74  | 9  | 2 |
| 17                       | 183                                                | 3  | 1  | 1 | 373                                               | 9   | 1  | 0 |
| 19                       | 168                                                | 14 | 5  | 1 | 325                                               | 49  | 7  | 2 |
| 20                       | 163                                                | 20 | 3  | 2 | 312                                               | 57  | 12 | 2 |
| 25                       | 186                                                | 2  | 0  | 0 | 383                                               | 0   | 0  | 0 |
| 26                       | 171                                                | 14 | 2  | 1 | 343                                               | 31  | 7  | 2 |
| 27                       | 164                                                | 18 | 4  | 2 | 319                                               | 56  | 8  | 0 |
| 28                       | 155                                                | 25 | 7  | 1 | 313                                               | 57  | 9  | 4 |

Note. <sup>a</sup>Item number of the original scale (Lee et al., 2017) was presented. <sup>b</sup>1 = "never", 2 = "sometimes", 3 = "frequently", 4 = "always".

5  
6  
7  
8

1 *Supplementary table 3*

## 2 Factor structure of Short form of the Internet Overuse Screening Questionnaire (IOS-

## 3 Qs)

| Item number of the original scale (Lee et al., 2017 [22])                                   | Pattern Matrix |         |
|---------------------------------------------------------------------------------------------|----------------|---------|
|                                                                                             | Factor1        | Factor2 |
| 22. I like using the internet more than spending time with family.                          | .939           | .001    |
| 21. I like using the internet more than socializing with friends.                           | .817           | -.096   |
| 24. I am not interested in anything except using the internet.                              | .617           | -.076   |
| 23. I quarrel with family due to my internet use.                                           | .468           | -.008   |
| 14. I skip school or work to go somewhere where I can use the internet.                     | .283           | .135    |
| 7. I become irritated or angry without the internet.                                        | .061           | .718    |
| 18. I am late for school, work, appointments, etc. due to my internet use.                  | -.085          | .693    |
| 6. I need to use the internet for a longer period of time to become as satisfied as before. | .199           | .532    |

4 Note. items were presented in orders of the coefficients.

5

6

1 *Supplementary table 4*

## 2 Correlations among items and sub-scores and total scores

| Item    | 22     | 21     | 24     | 23     | 14     | 7      | 18     | 6      | Factor1 | Factor2 |
|---------|--------|--------|--------|--------|--------|--------|--------|--------|---------|---------|
| 21      | .776** |        |        |        |        |        |        |        |         |         |
| 24      | .589** | .496** |        |        |        |        |        |        |         |         |
| 23      | .396** | .316** | .338** |        |        |        |        |        |         |         |
| 14      | .303** | .153** | .306** | .319** |        |        |        |        |         |         |
| 7       | .452** | .302** | .293** | .216** | .215** |        |        |        |         |         |
| 18      | .273** | .199** | .258** | .083   | .137** | .492** |        |        |         |         |
| 6       | .452** | .333** | .357** | .221** | .262** | .488** | .396** |        |         |         |
| Factor1 | .891** | .825** | .745** | .643** | .460** | .414** | .263** | .449** |         |         |
| Factor2 | .512** | .360** | .381** | .236** | .266** | .875** | .685** | .809** | .488**  |         |
| Total   | .834** | .713** | .673** | .532** | .432** | .719** | .524** | .706** | .891**  | .831**  |

3 Note. \*\* $p < .01$ . Factor1 was a sum score of item 22, 21, 24, 23, and 14, which highly loaded to  
 4 factor 1. Factor 2 was a sum score of item 7, 18, and 6, which highly loaded to factor 2.

5

6

7

1 *Supplementary table 5*

2 Comorbidities of problematic internet over-users classified by latent-class analysis

3 using the original scale with 28 items (Lee et al., 2017)

| Dependent variables            | <i>b</i>    | <i>SE</i>   | OR [95% CI]               | <i>p</i>    |
|--------------------------------|-------------|-------------|---------------------------|-------------|
| <b>All mental disorders</b>    | <b>1.11</b> | <b>0.41</b> | <b>2.89 [1.31, 6.39]</b>  | <b>.009</b> |
| <b>Mood disorder</b>           | <b>2.03</b> | <b>0.63</b> | <b>7.60 [2.21, 26.11]</b> | <b>.001</b> |
| <b>Depressive disorder</b>     | <b>1.74</b> | <b>0.65</b> | <b>5.69 [1.59, 20.42]</b> | <b>.008</b> |
| Dysthymic disorder             | -           | -           | -                         | -           |
| Bipolar disorder               | -           | -           | -                         | -           |
| Anxiety disorder               | 1.10        | 0.98        | 2.30 [0.44, 20.48]        | .263        |
| Post-traumatic stress disorder | -           | -           | -                         | -           |
| Obsessive compulsive disorder  | -           | -           | -                         | -           |
| Panic disorder                 | -           | -           | -                         | -           |
| Agoraphobia                    | -           | -           | -                         | -           |
| Social anxiety disorder        | 1.08        | 1.03        | 2.93 [0.39, 22.01]        | .296        |
| Generalized anxiety disorder   | -           | -           | -                         | -           |
| Nicotine use disorder          | 0.26        | 0.83        | 1.30 [0.26, 6.62]         | .753        |
| Alcohol use disorder           | 0.08        | 0.68        | 1.01 [0.27, 3.81]         | .991        |

4 Note. *SE* = standard error, OR = odds ratio, CI = confidence interval

5
